# Supplementary material
Source: MDPI journal article supplement (https://www.mdpi.com/2075-4701/10/5/692)
Supplement: s1 [file s1]

# Rietveld refinement plots

In this file all the Rietveld plots obtained after the last refinement cycle are reported. The red dotted and the black continuous line are the experimental and the calculated diffractogram, respectively; the lower blue line is the difference curve; the vertical green bars indicate the position of the expected peaks for each phase.

According to the %Fe content with respect to the total (Fe + Ni) amount, and to the analysis temperature (in K), samples were named Fe40\_303, Fe55\_473, and so on.

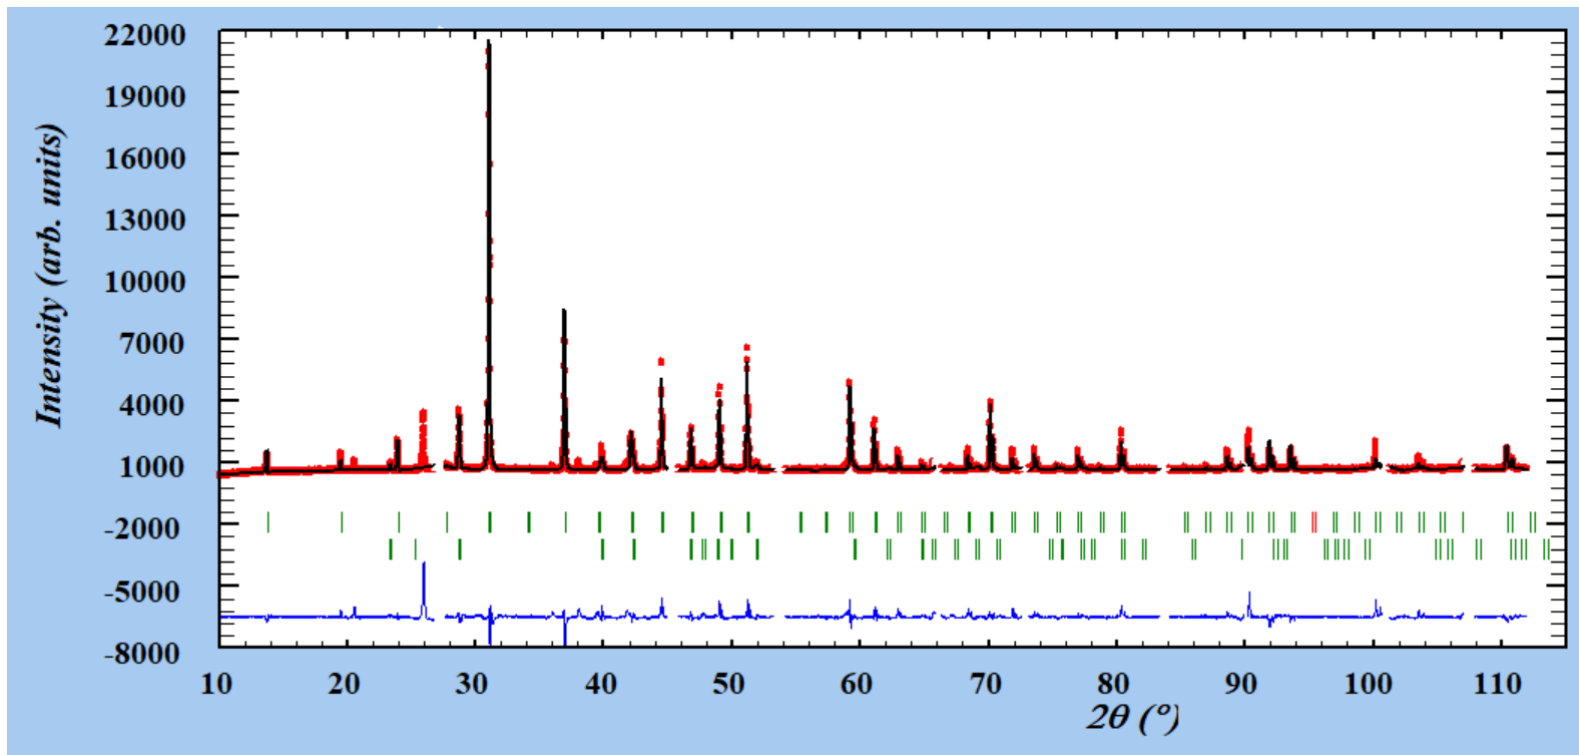

**Figure S1** – Rietveld refinement plot for sample Sm40\_303. Upper vertical bars: skutterudite; lower vertical bars:  $\text{Sb}_{0.95}\text{Sn}_{0.05}$ . Excluded regions are placed in correspondence of Bragg peaks of the internal standard Ge.

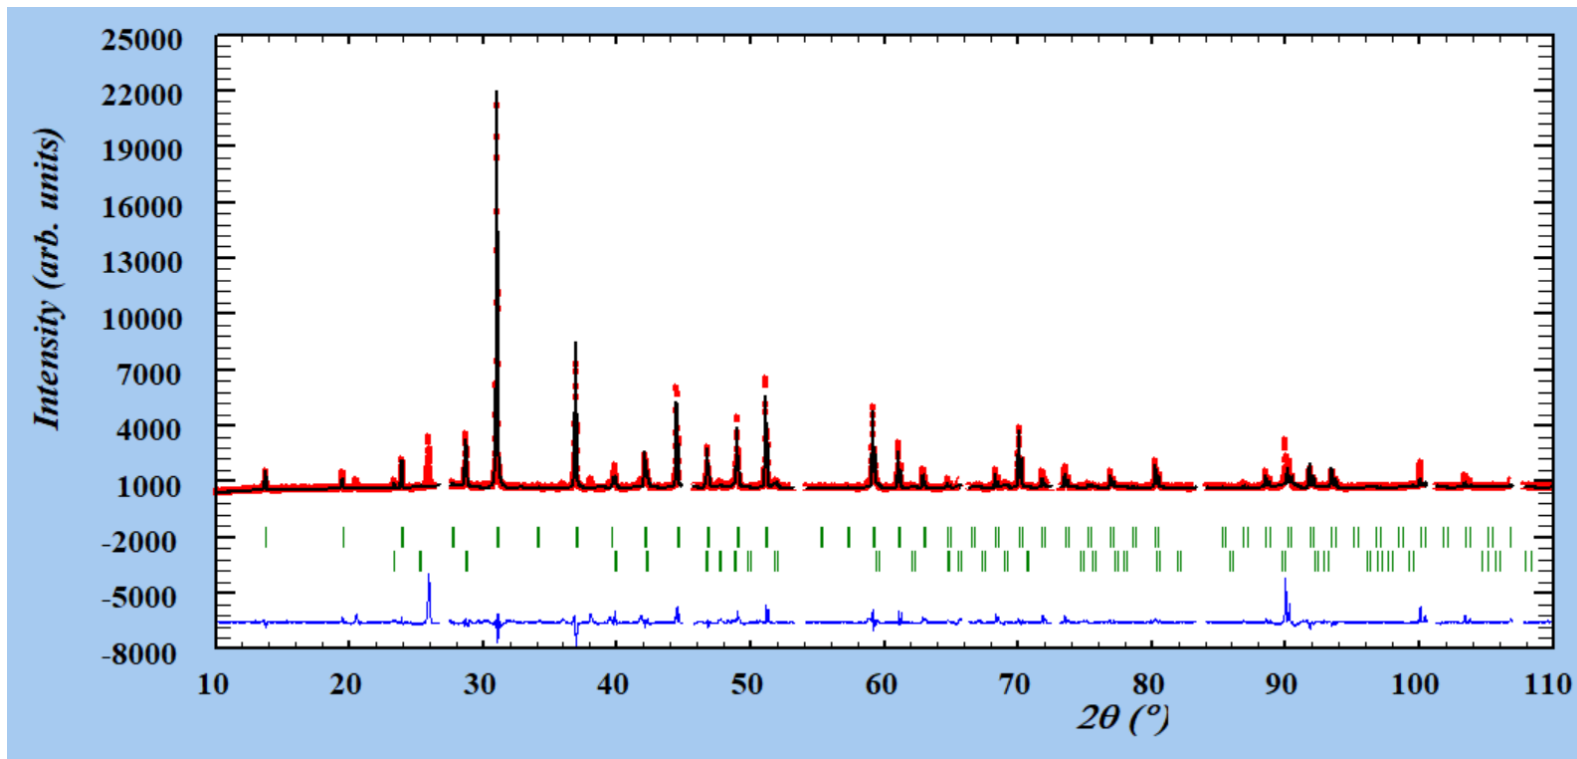

**Figure S2** – Rietveld refinement plot for sample Sm40\_373. Upper vertical bars: skutterudite; lower vertical bars:  $\text{Sb}_{0.95}\text{Sn}_{0.05}$ . Excluded regions are placed in correspondence of Bragg peaks of the internal standard Ge.

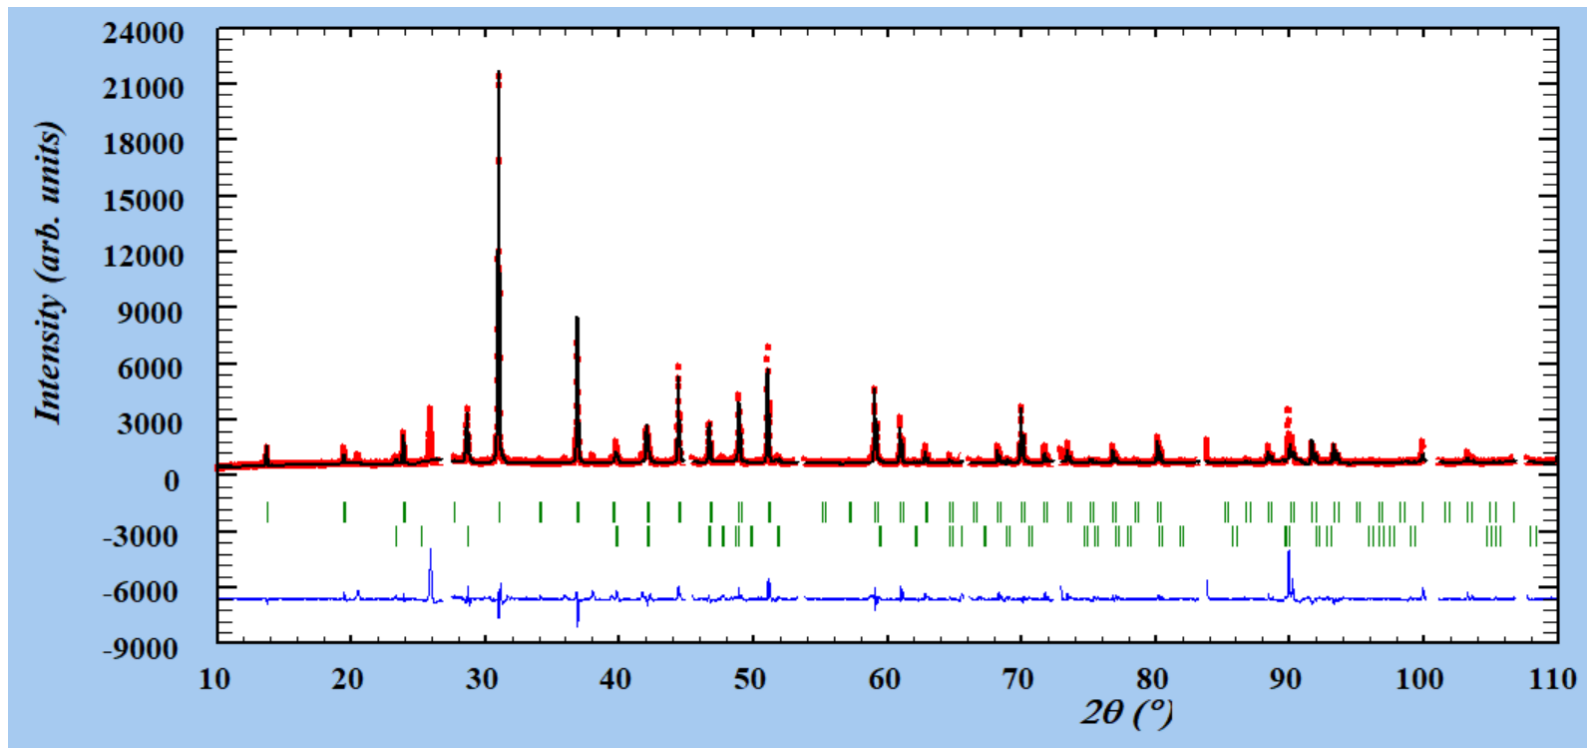

**Figure S3** – Rietveld refinement plot for sample Sm40\_473. Upper vertical bars: skutterudite; lower vertical bars:  $\text{Sb}_{0.95}\text{Sn}_{0.05}$ . Excluded regions are placed in correspondence of Bragg peaks of the internal standard Ge.

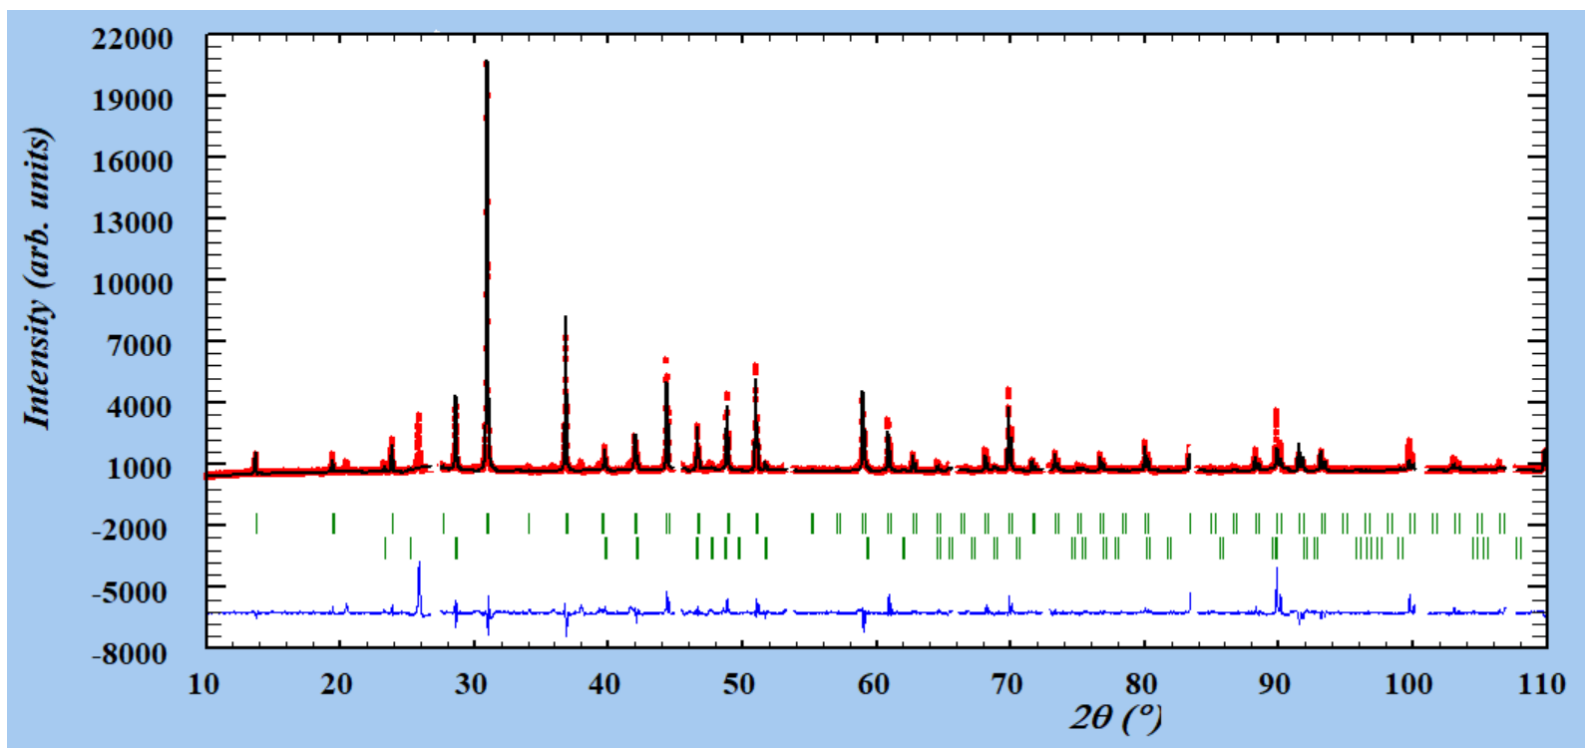

**Figure S4** – Rietveld refinement plot for sample Sm40\_573. Upper vertical bars: skutterudite; lower vertical bars:  $\text{Sb}_{0.95}\text{Sn}_{0.05}$ . Excluded regions are placed in correspondence of Bragg peaks of the internal standard Ge.

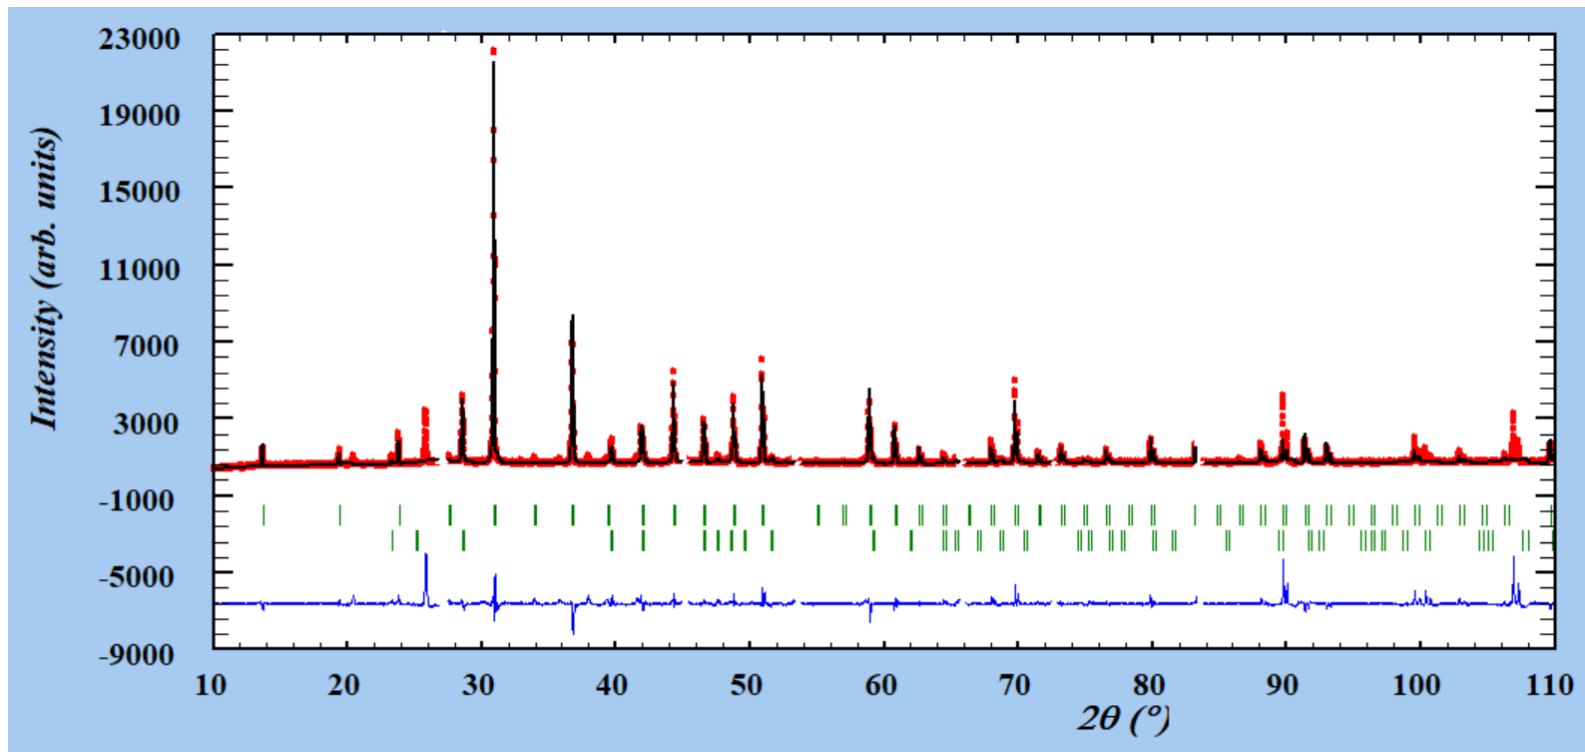

**Figure S5** – Rietveld refinement plot for sample Sm40\_673. Upper vertical bars: skutterudite; lower vertical bars:  $\text{Sb}_{0.95}\text{Sn}_{0.05}$ . Excluded regions are placed in correspondence of Bragg peaks of the internal standard Ge.

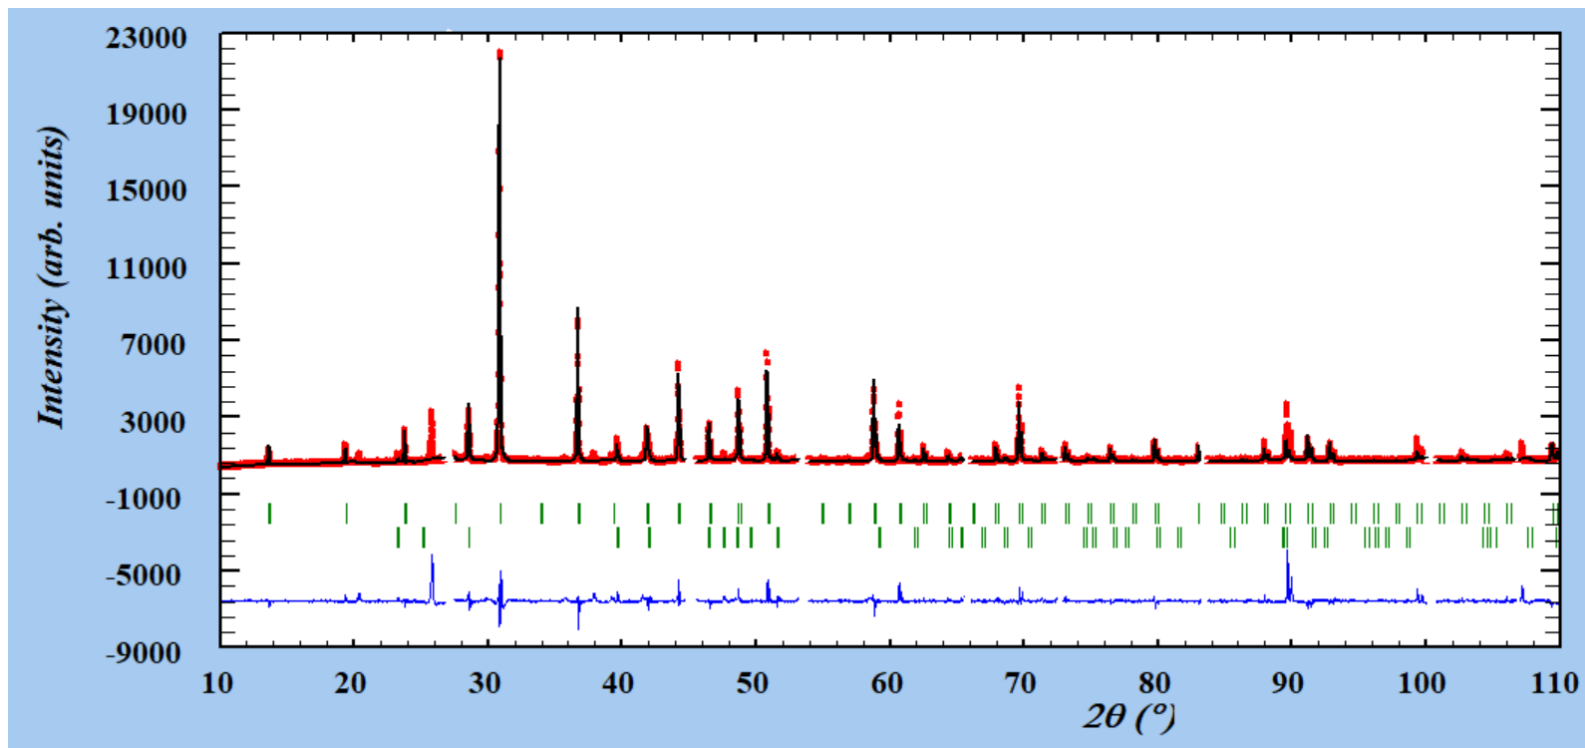

**Figure S6** – Rietveld refinement plot for sample Sm40\_773. Upper vertical bars: skutterudite; lower vertical bars:  $\text{Sb}_{0.95}\text{Sn}_{0.05}$ . Excluded regions are placed in correspondence of Bragg peaks of the internal standard Ge.

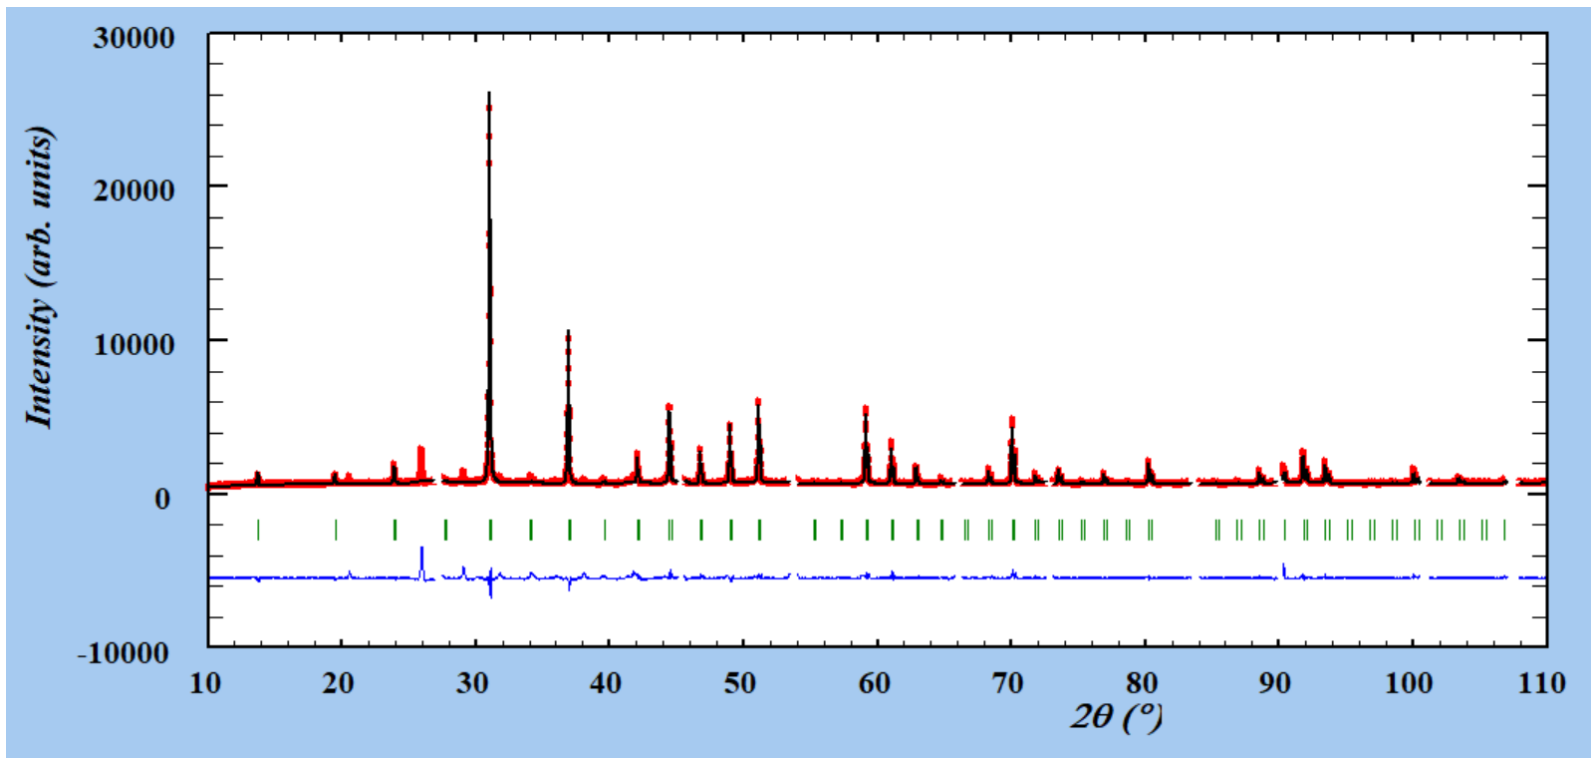

**Figure S7** – Rietveld refinement plot for sample Sm55\_303. Vertical bars: skutterudite. Excluded regions are placed in correspondence of Bragg peaks of the internal standard Ge.



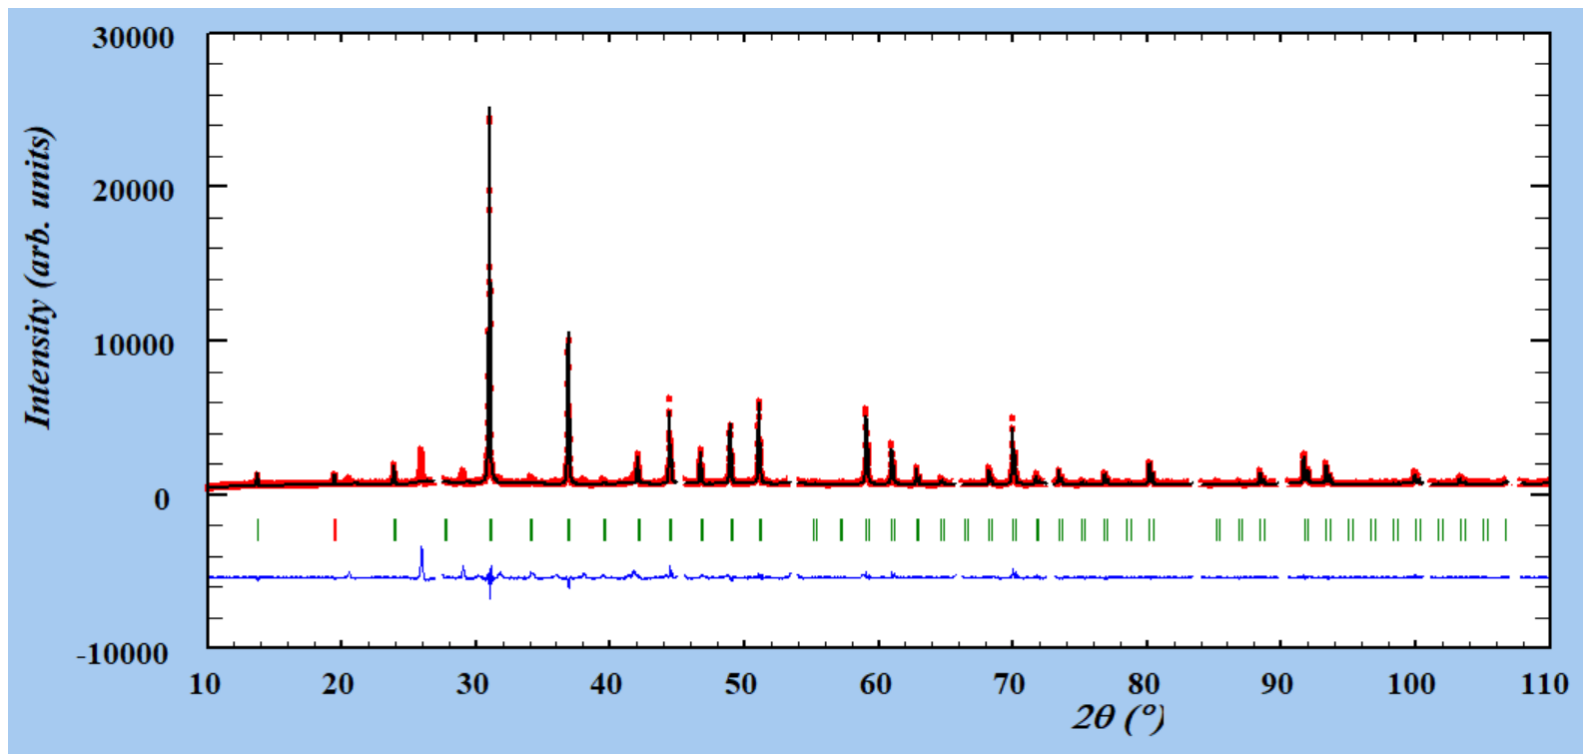

**Figure S8** – Rietveld refinement plot for sample Sm55\_373. Vertical bars: skutterudite. Excluded regions are placed in correspondence of Bragg peaks of the internal standard Ge.

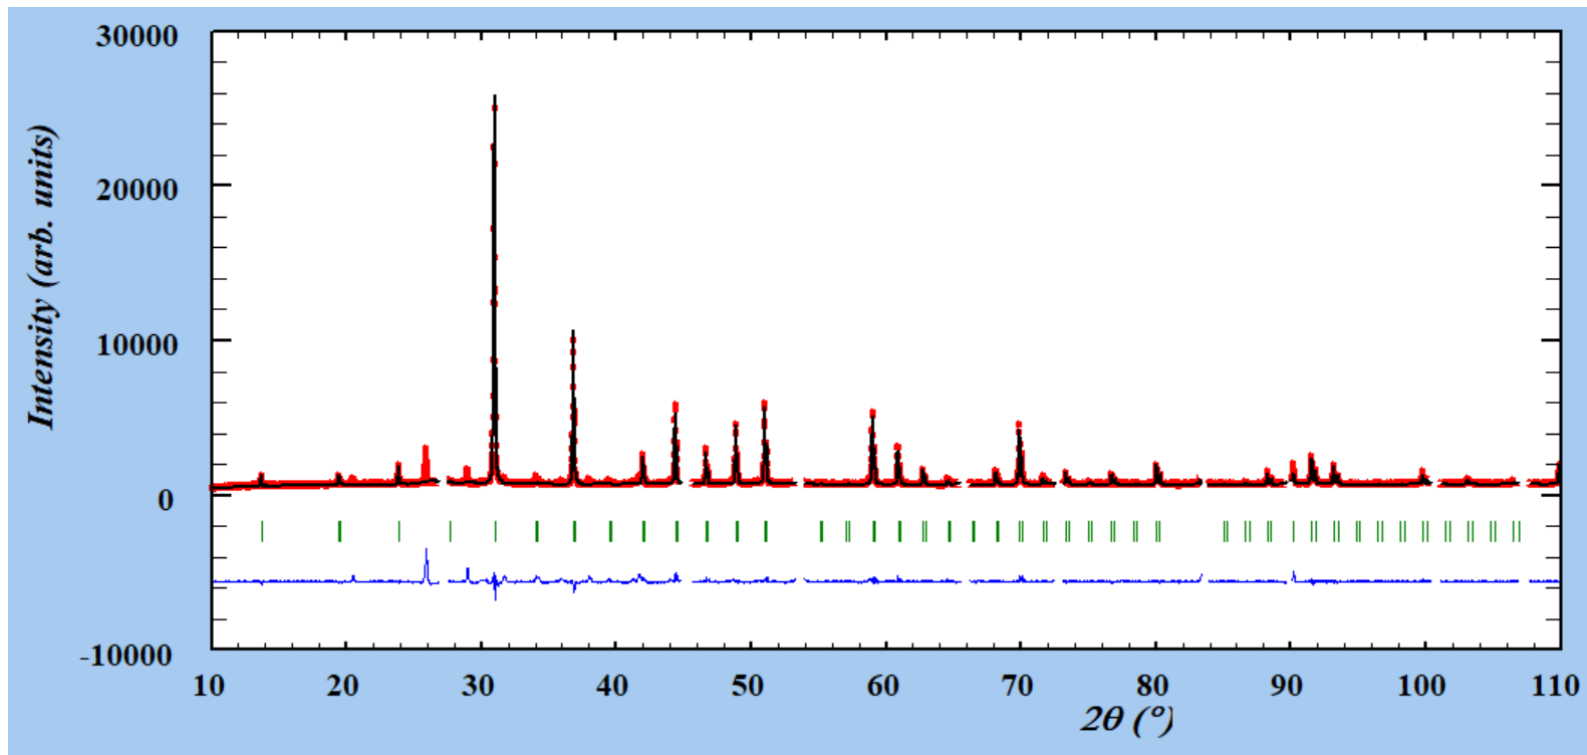

**Figure S9** – Rietveld refinement plot for sample Sm55\_473. Vertical bars: skutterudite. Excluded regions are placed in correspondence of Bragg peaks of the internal standard Ge.

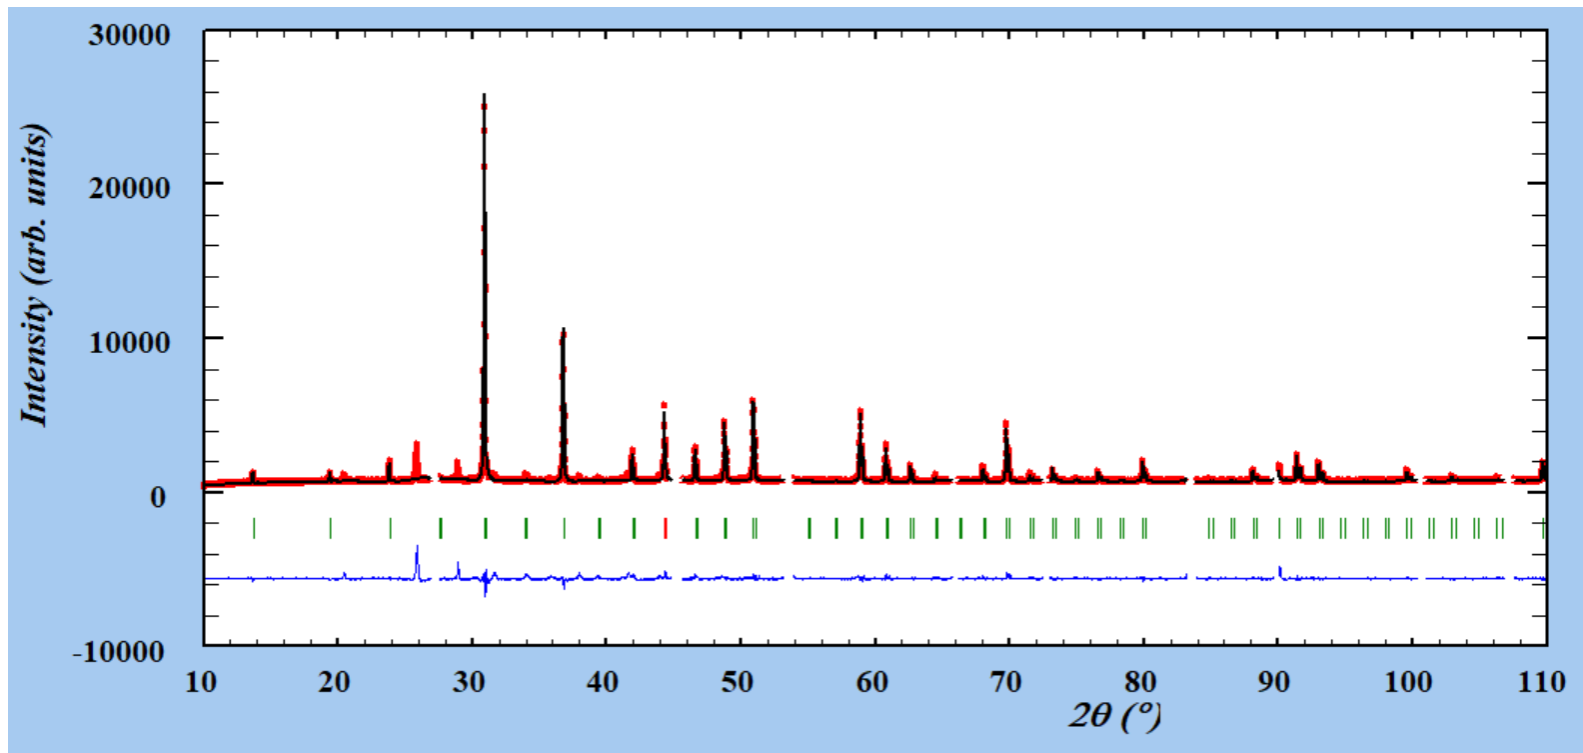

**Figure S10** – Rietveld refinement plot for sample Sm55\_573. Vertical bars: skutterudite. Excluded regions are placed in correspondence of Bragg peaks of the internal standard Ge.

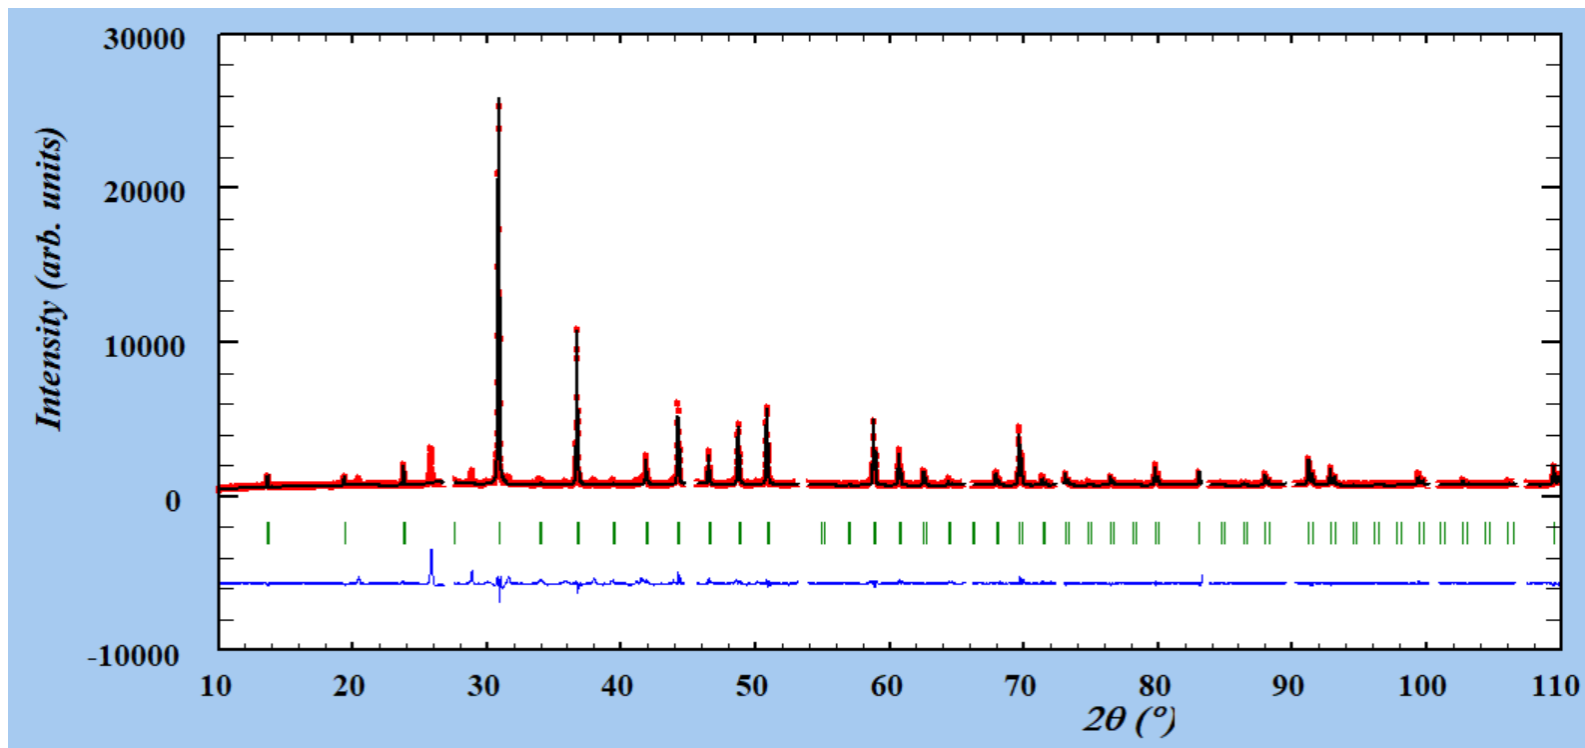

**Figure S11** – Rietveld refinement plot for sample Sm55\_673. Vertical bars: skutterudite. Excluded regions are placed in correspondence of Bragg peaks of the internal standard Ge.

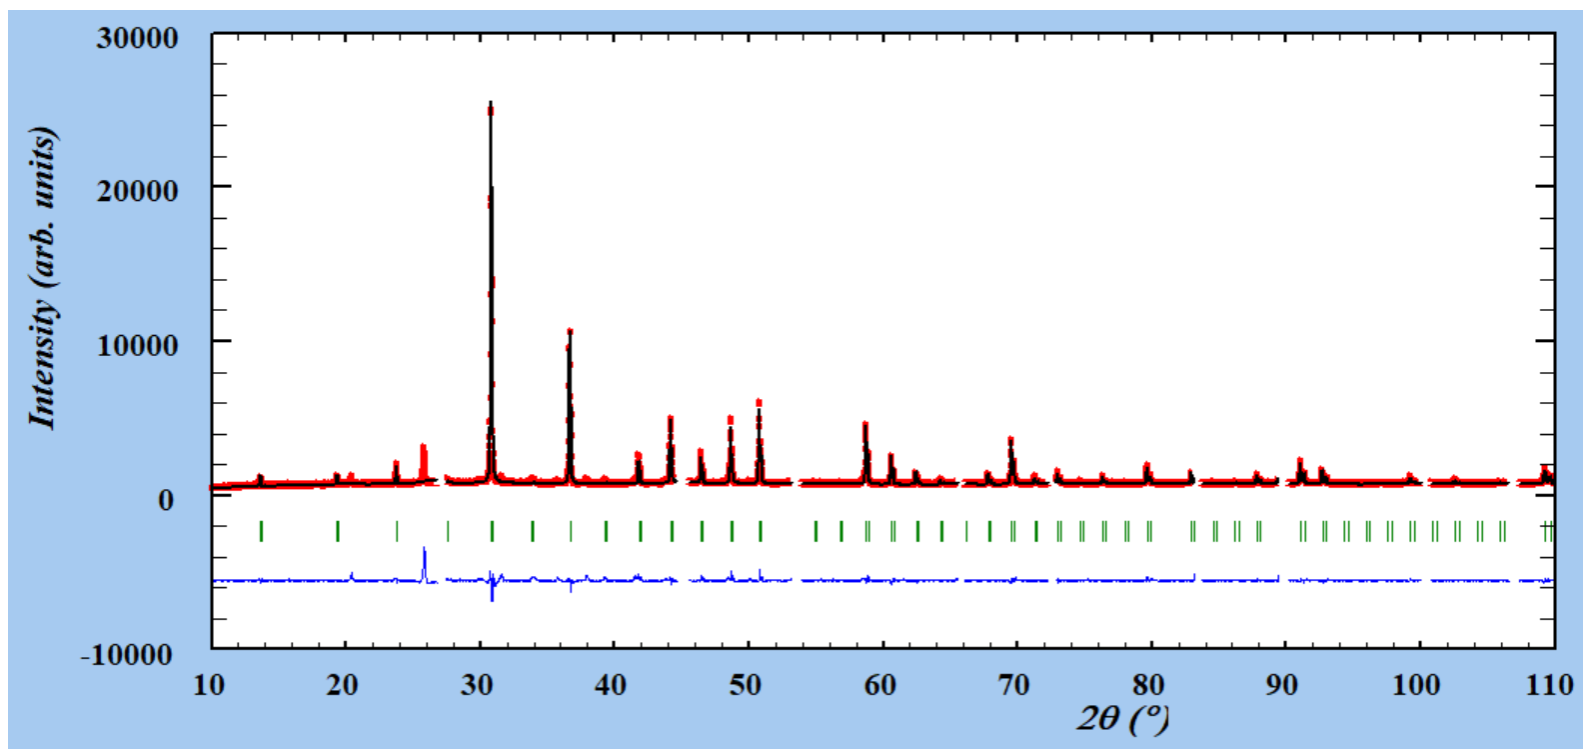

**Figure S12** – Rietveld refinement plot for sample Sm55\_773. Vertical bars: skutterudite. Excluded regions are placed in correspondence of Bragg peaks of the internal standard Ge.

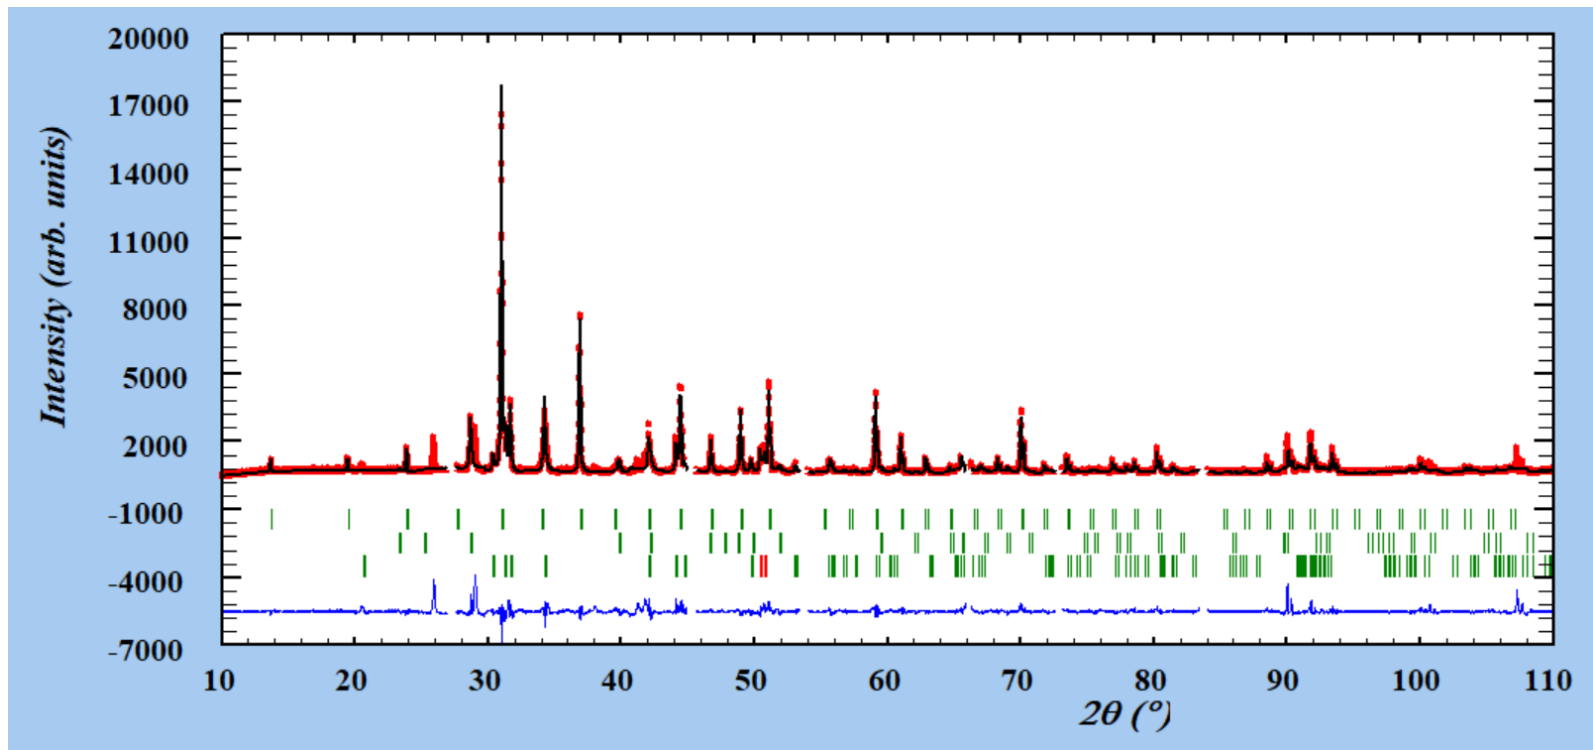

**Figure S13** – Rietveld refinement plot for sample Sm60\_303. Upper vertical bars: skutterudite; intermediate vertical bars:  $\text{Sb}_{0.95}\text{Sn}_{0.05}$ ; lower vertical bars:  $\text{Fe}_{0.66}\text{Ni}_{0.33}\text{Sb}_2$ . Excluded regions are placed in correspondence of Bragg peaks of the internal standard Ge.

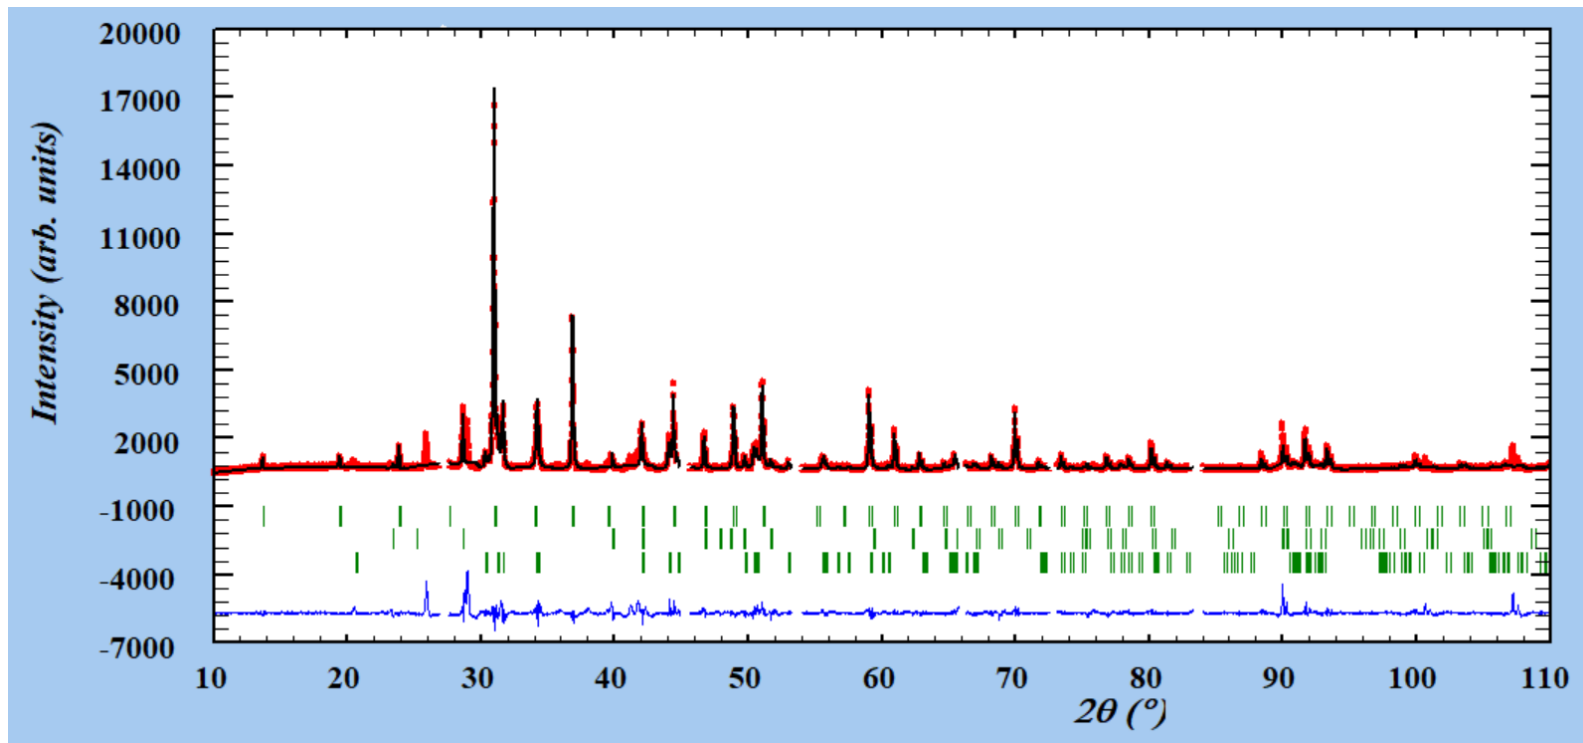

**Figure S14** – Rietveld refinement plot for sample Sm60\_373. Upper vertical bars: skutterudite; intermediate vertical bars:  $\text{Sb}_{0.95}\text{Sn}_{0.05}$ ; lower vertical bars:  $\text{Fe}_{0.66}\text{Ni}_{0.33}\text{Sb}_2$ . Excluded regions are placed in correspondence of Bragg peaks of the internal standard Ge.

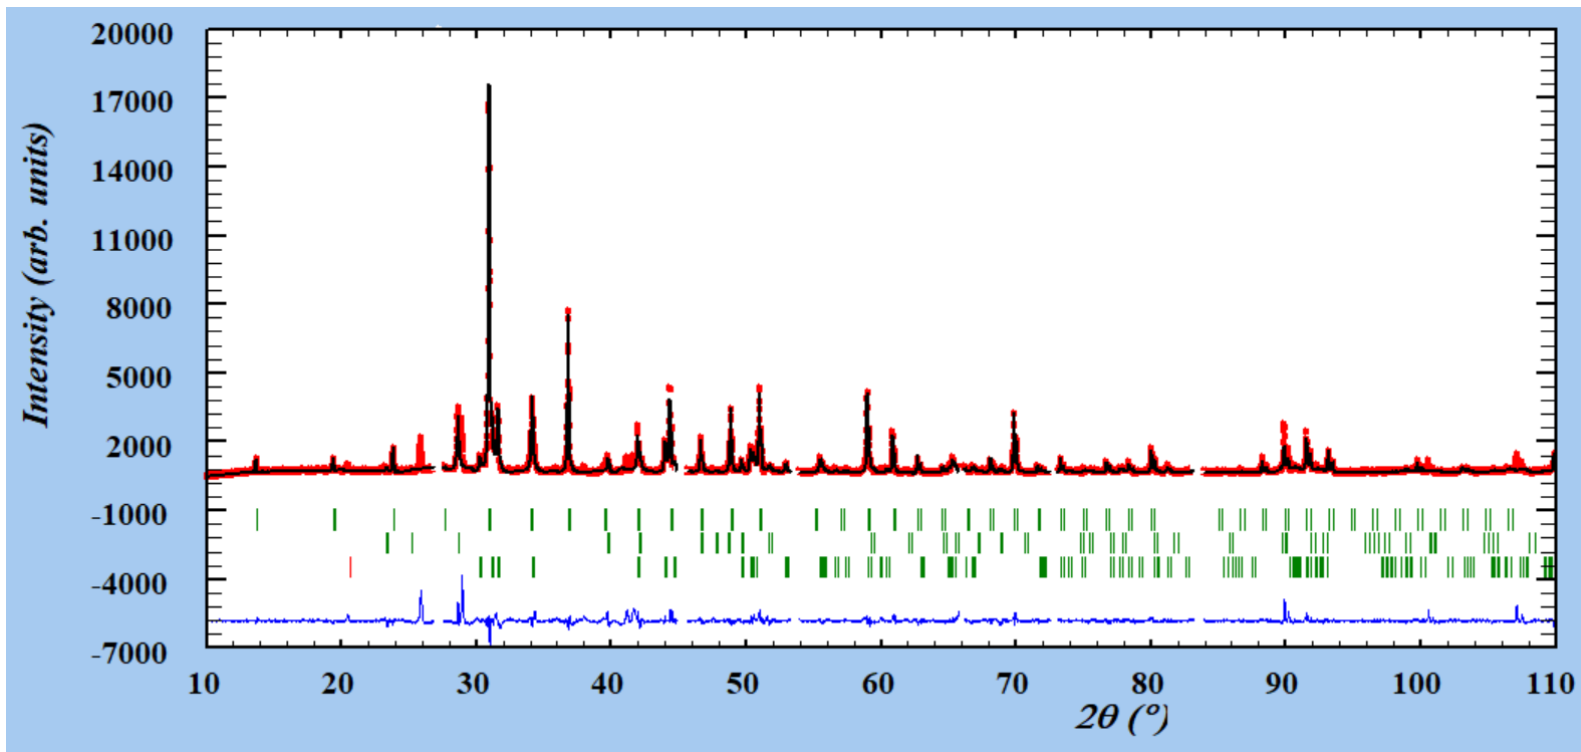

**Figure S15** – Rietveld refinement plot for sample Sm60\_473. Upper vertical bars: skutterudite; intermediate vertical bars:  $\text{Sb}_{0.95}\text{Sn}_{0.05}$ ; lower vertical bars:  $\text{Fe}_{0.66}\text{Ni}_{0.33}\text{Sb}_2$ . Excluded regions are placed in correspondence of Bragg peaks of the internal standard Ge.



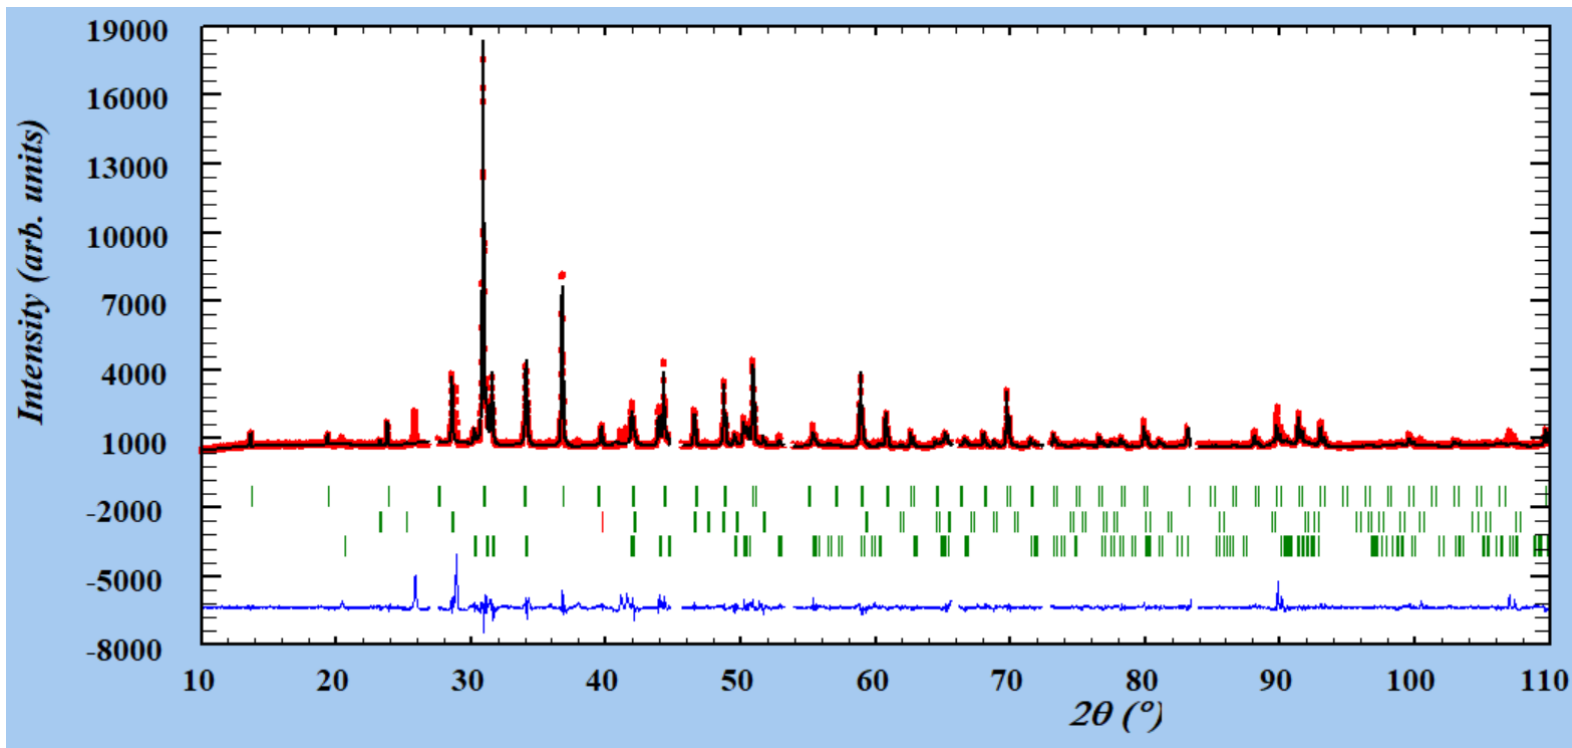

**Figure S16** – Rietveld refinement plot for sample Sm60\_573. Upper vertical bars: skutterudite; intermediate vertical bars:  $\text{Sb}_{0.95}\text{Sn}_{0.05}$ ; lower vertical bars:  $\text{Fe}_{0.66}\text{Ni}_{0.33}\text{Sb}_2$ . Excluded regions are placed in correspondence of Bragg peaks of the internal standard Ge.

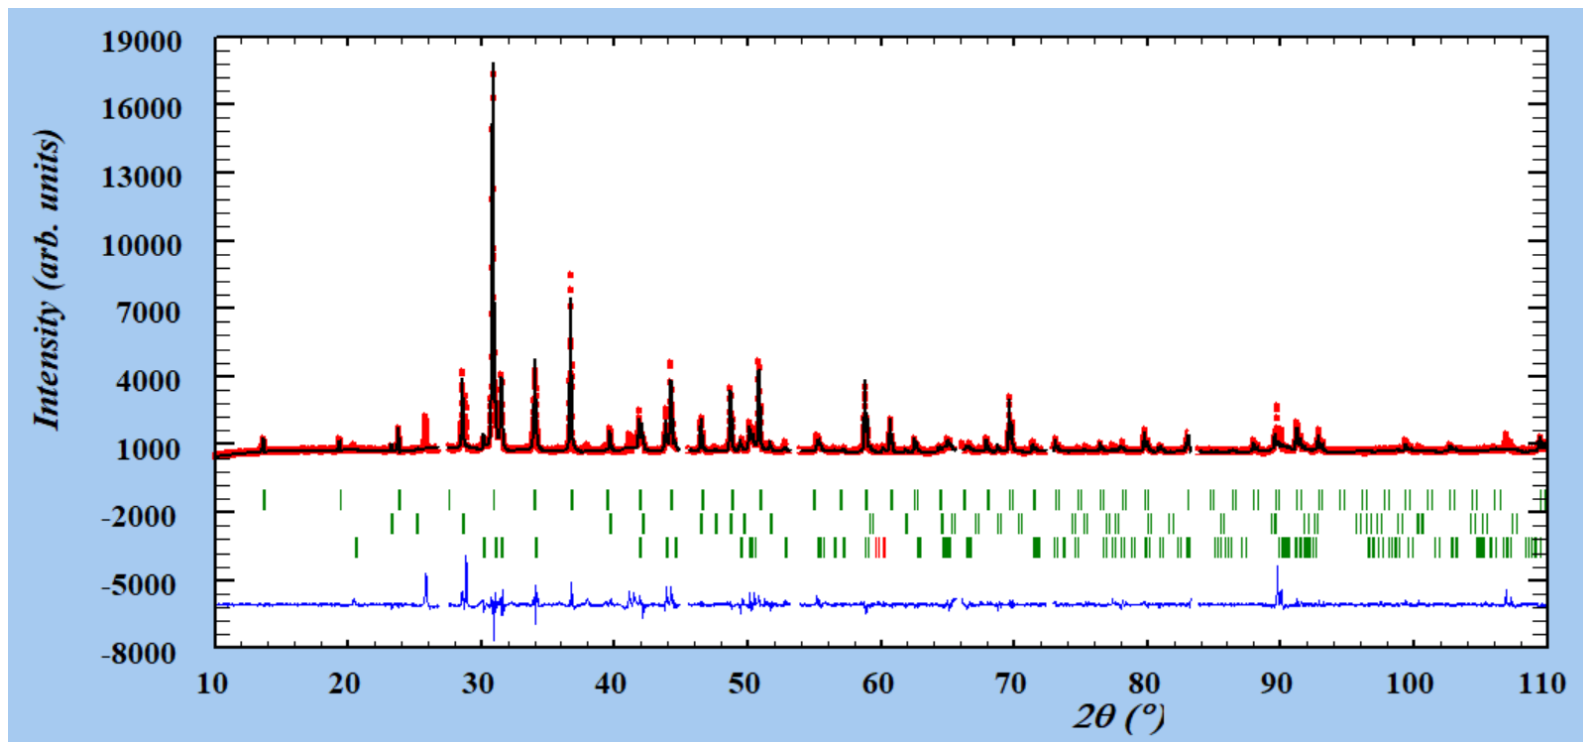

**Figure S17** – Rietveld refinement plot for sample Sm60\_673. Upper vertical bars: skutterudite; intermediate vertical bars:  $\text{Sb}_{0.95}\text{Sn}_{0.05}$ ; lower vertical bars:  $\text{Fe}_{0.66}\text{Ni}_{0.33}\text{Sb}_2$ . Excluded regions are placed in correspondence of Bragg peaks of the internal standard Ge.

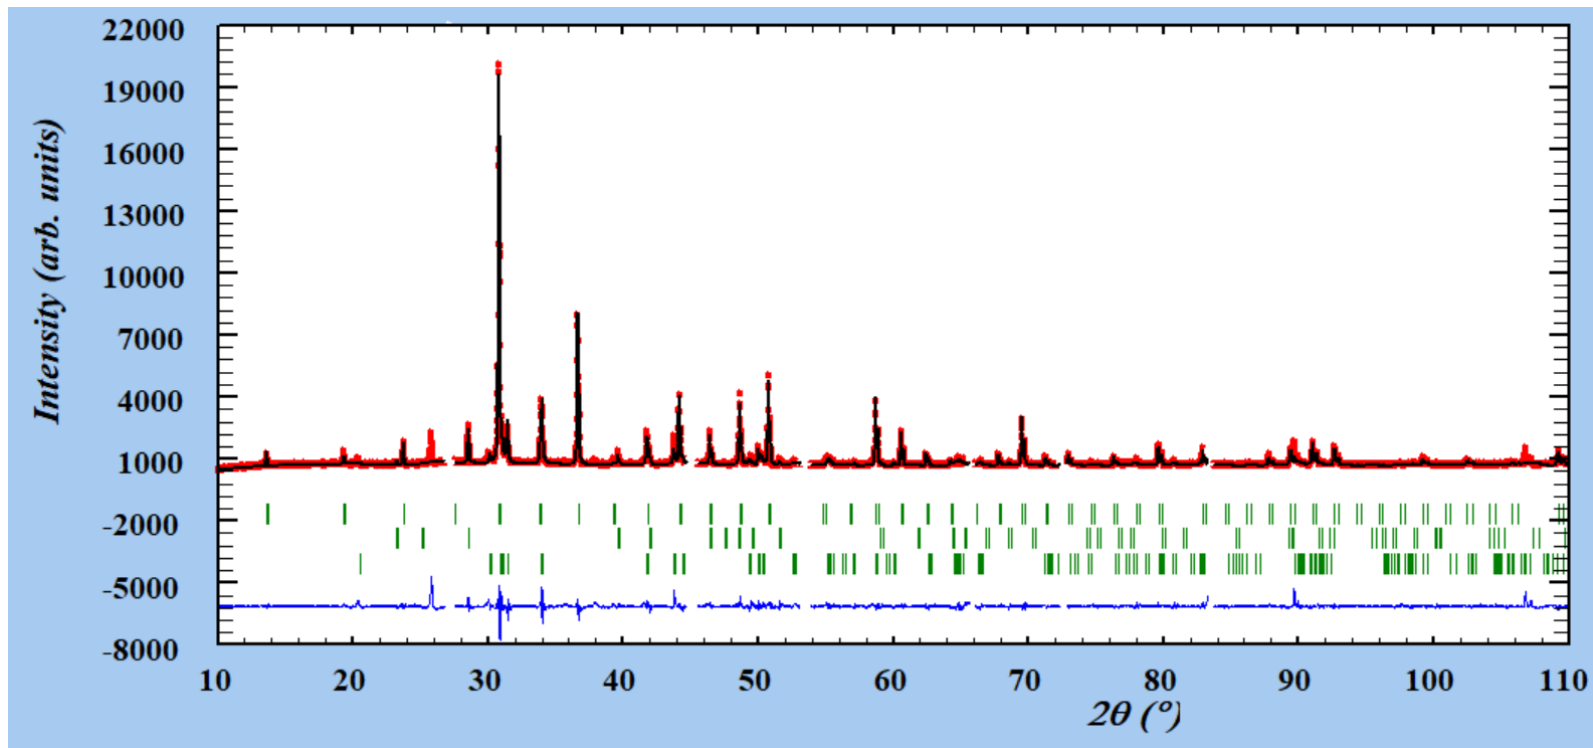

**Figure S18** – Rietveld refinement plot for sample Sm60\_773. Upper vertical bars: skutterudite; intermediate vertical bars:  $\text{Sb}_{0.95}\text{Sn}_{0.05}$ ; lower vertical bars:  $\text{Fe}_{0.66}\text{Ni}_{0.33}\text{Sb}_2$ . Excluded regions are placed in correspondence of Bragg peaks of the internal standard Ge.
